# Supplementary material
Source: publisher figshare collection journal article supplement (https://f1000.figshare.com/articles/dataset/_/155789)
Supplement: Supplementary file 1 [file 1]

**Explanation of column headers and codes:**

day - day of the assay

div_trt - prey diversity treatment; “Monoculture” corresponds to treatments with only the CBS strain of *Synura* present; “Polyculture” corresponds to treatments with all five strains of *Synura* initially present.

brach_trt - predator treatment; “present” corresponds to the presence of the predator (*Brachionus*); “absent” corresponds to the absence of the predator

rep - numbered replicate identifier

cellspercolony - mean number of cells per *Synura* colony
